# Supplementary material for: dSir2 mediates the increased spontaneous physical activity in flies on calorie restriction
Source: Aging (Albany NY). 2009 Jun 22;1(6):529–41. doi: 10.18632/aging.100061 (PMC2806034; doi:10.18632/aging.100061)
Supplement: Supplementary Table 1-summarized — The pairwise differences can be summarized as follows: [file aging-01-529-s001-summarized.doc]

**Supplemental Table 1: Resveratrol rescues low activity of the flies on high calorie diet**

The pairwise differences can be summarized as follows:

|  | 0.5 50Res | 0.5 100Res | 0.5 200Res | 0.5 EtOH | 1.5 50Res | 1.5 100Res | 1.5 200Res | 1.5 EtOH |
| --- | --- | --- | --- | --- | --- | --- | --- | --- |
| 0.5 50Res | - | - | - | ** | *** | * | ** | - |
| 0.5 100Res |  | - | * | - | * | - | - | - |
| 0.5 200Res |  |  | - | *** | *** | *** | *** | - |
| 0.5 EtOH |  |  |  | - | - | - | - | ** |
| 1.5 50Res |  |  |  |  | - | - | - | *** |
| 1.5 100Res |  |  |  |  |  | - | - | * |
| 1.5 200Res |  |  |  |  |  |  | - | *** |
| 1.5 EtOH |  |  |  |  |  |  |  | - |

* = p < .05

** p < .01

*** = p < .001

A Tukey HSD post-hoc test was conducted on the mean 24 hour spontaneous physical activity of male wild type *CS* flies kept on low food with 50M, 100M and 200 M resveratrol (0.5 50Res, 0.5 100Res, 0.5 200Res), 0.5 low calorie food with ethanol, (0.5 EtOH) or high calorie food with 50M, 100M and 200 M resveratrol (1.5 50Res, 1.5 100Res, 1.5 200Res) or ethanol (1.5 EtOH) to determine which means are paiwise statistically significantly different from one another. Flies were kept at 25° C during recording of the spontaneous physical activity. Flies were 9 days old.
