# Supplementary material for: dSir2 mediates the increased spontaneous physical activity in flies on calorie restriction
Source: Aging (Albany NY). 2009 Jun 22;1(6):529–41. doi: 10.18632/aging.100061 (PMC2806034; doi:10.18632/aging.100061)
Supplement: Supplementary Table 1B [file aging-01-529-s001B.doc]

**Supplemental Table 1: Resveratrol rescues low activity of the flies on high calorie diet**

B)

| Food 1 | Food 2 | Mean Difference  Food 1 –Food 2 | p-value |
| --- | --- | --- | --- |
| 0.5 Res | 0.5 EtOH | -923.66 | 0.533 |
|  | 1.5 200Res | -3739.33* | 0.000 |
|  | 1.5 EtOH | -612.66 | 0.807 |
|  |  |  |  |
| 0.5 EtOH | 0.5 200Res | 923.66 | 0.533 |
|  | 1.5 200Res | -2815.66* | 0.000 |
|  | 1.5 EtOH | 311.00 | 0.969 |
|  |  |  |  |
| 1.5 Res | 0.5 200Res | 3739.33* | 0.000 |
|  | 0.5 EtOH | 2815.66* | 0.000 |
|  | 1.5 EtOH | 3126.66* | 0.000 |
|  |  |  |  |
| 1.5 EtOH | 0.5 200Res | 612.66 | 0.807 |
|  | 0.5 EtOH | -311.00 | 0.969 |
|  | 1.5 200Res | -3126.66* | 0.000 |

A Tukey HSD post-hoc test was conducted on the mean 24 hour spontaneous physical activity of male wild type *CS* flies kept on low food with 200 M resveratrol (0.5 200Res), 0.5 low calorie food with ethanol, (0.5 EtOH) or high calorie food with 200 M resveratrol (1.5 200Res) or ethanol (1.5 EtOH) to determine which means are paiwise statistically significantly different from one another. Flies were kept at 25° C during recording of the spontaneous physical activity. Flies were and 6 days old.
